# Supplementary material for: The Phylogeny of Class B Flavoprotein Monooxygenases and the Origin of the YUCCA Protein Family
Source: MDPI journal article supplement (doi:10.3390/plants9091092), 2020-08-25
Supplement: s1 [file s1]

**Supplementary materials for Turnaev et al. 2020**  
Phylogenetic trees for class B flavoprotein monooxygenases.

(a)

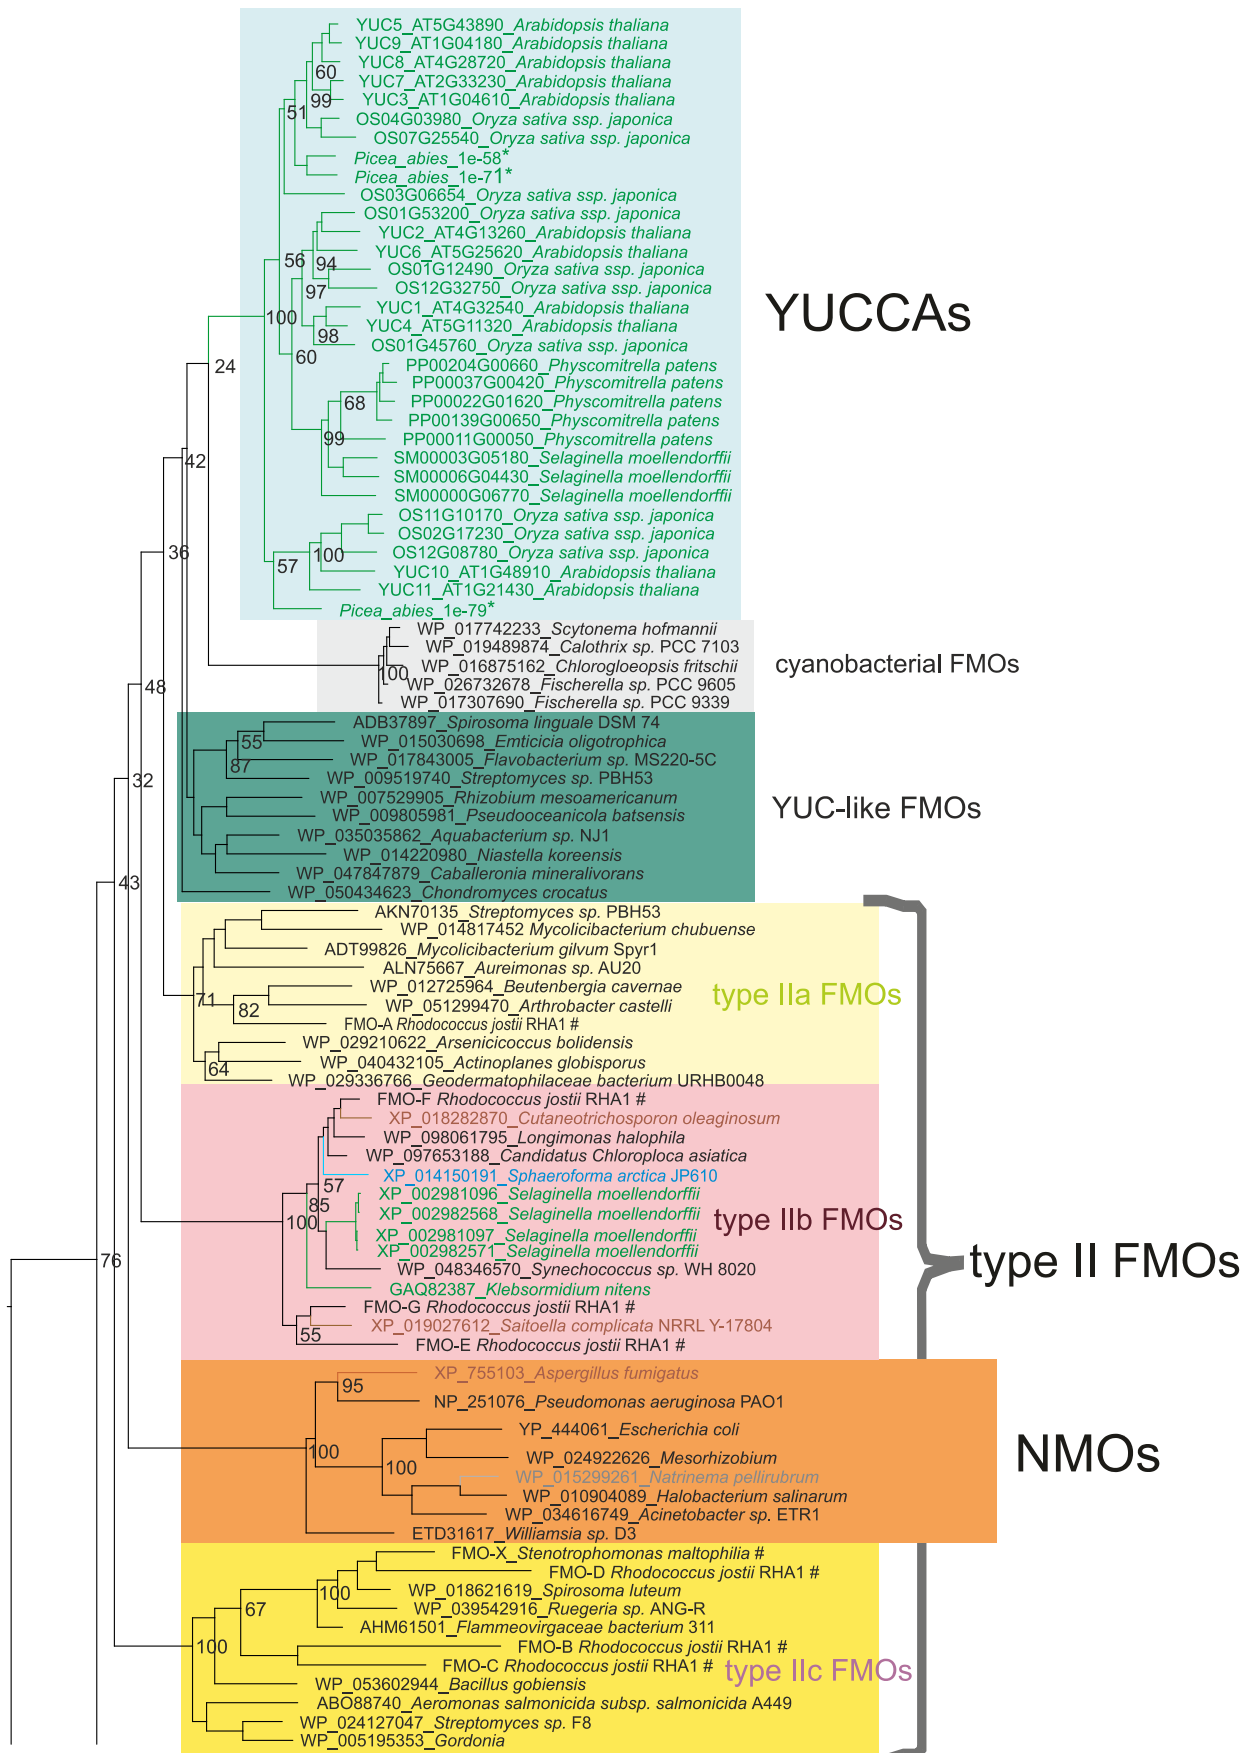

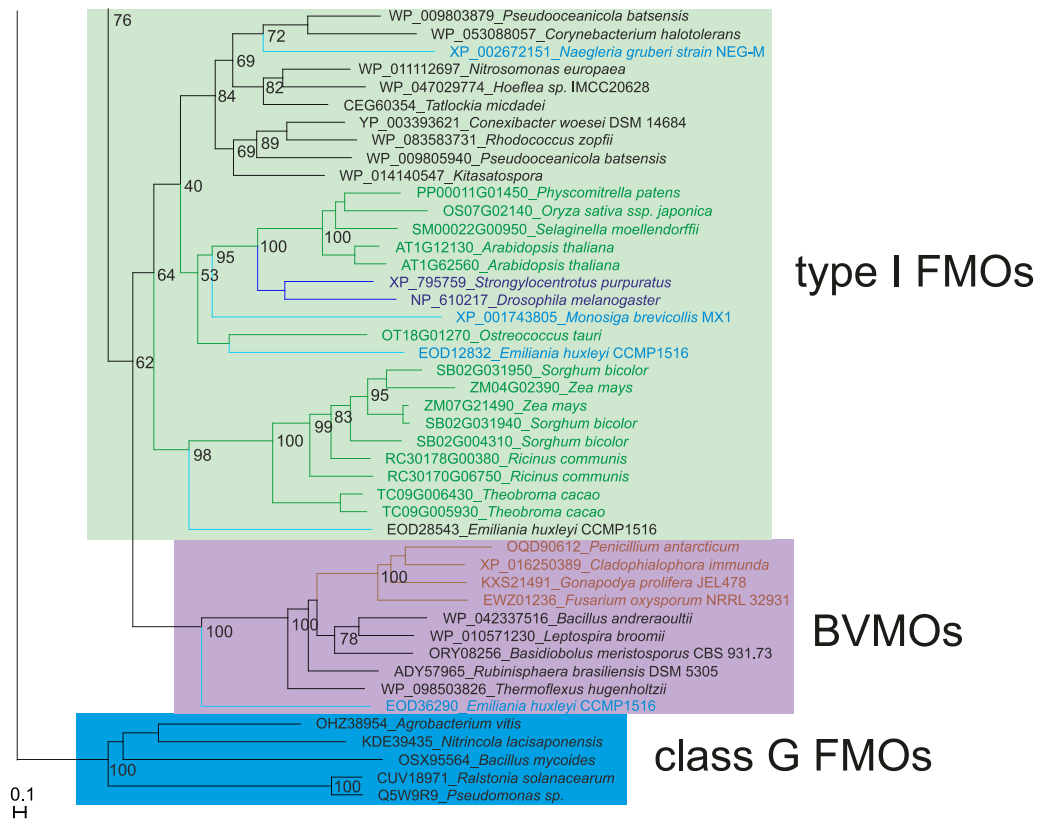

(b)

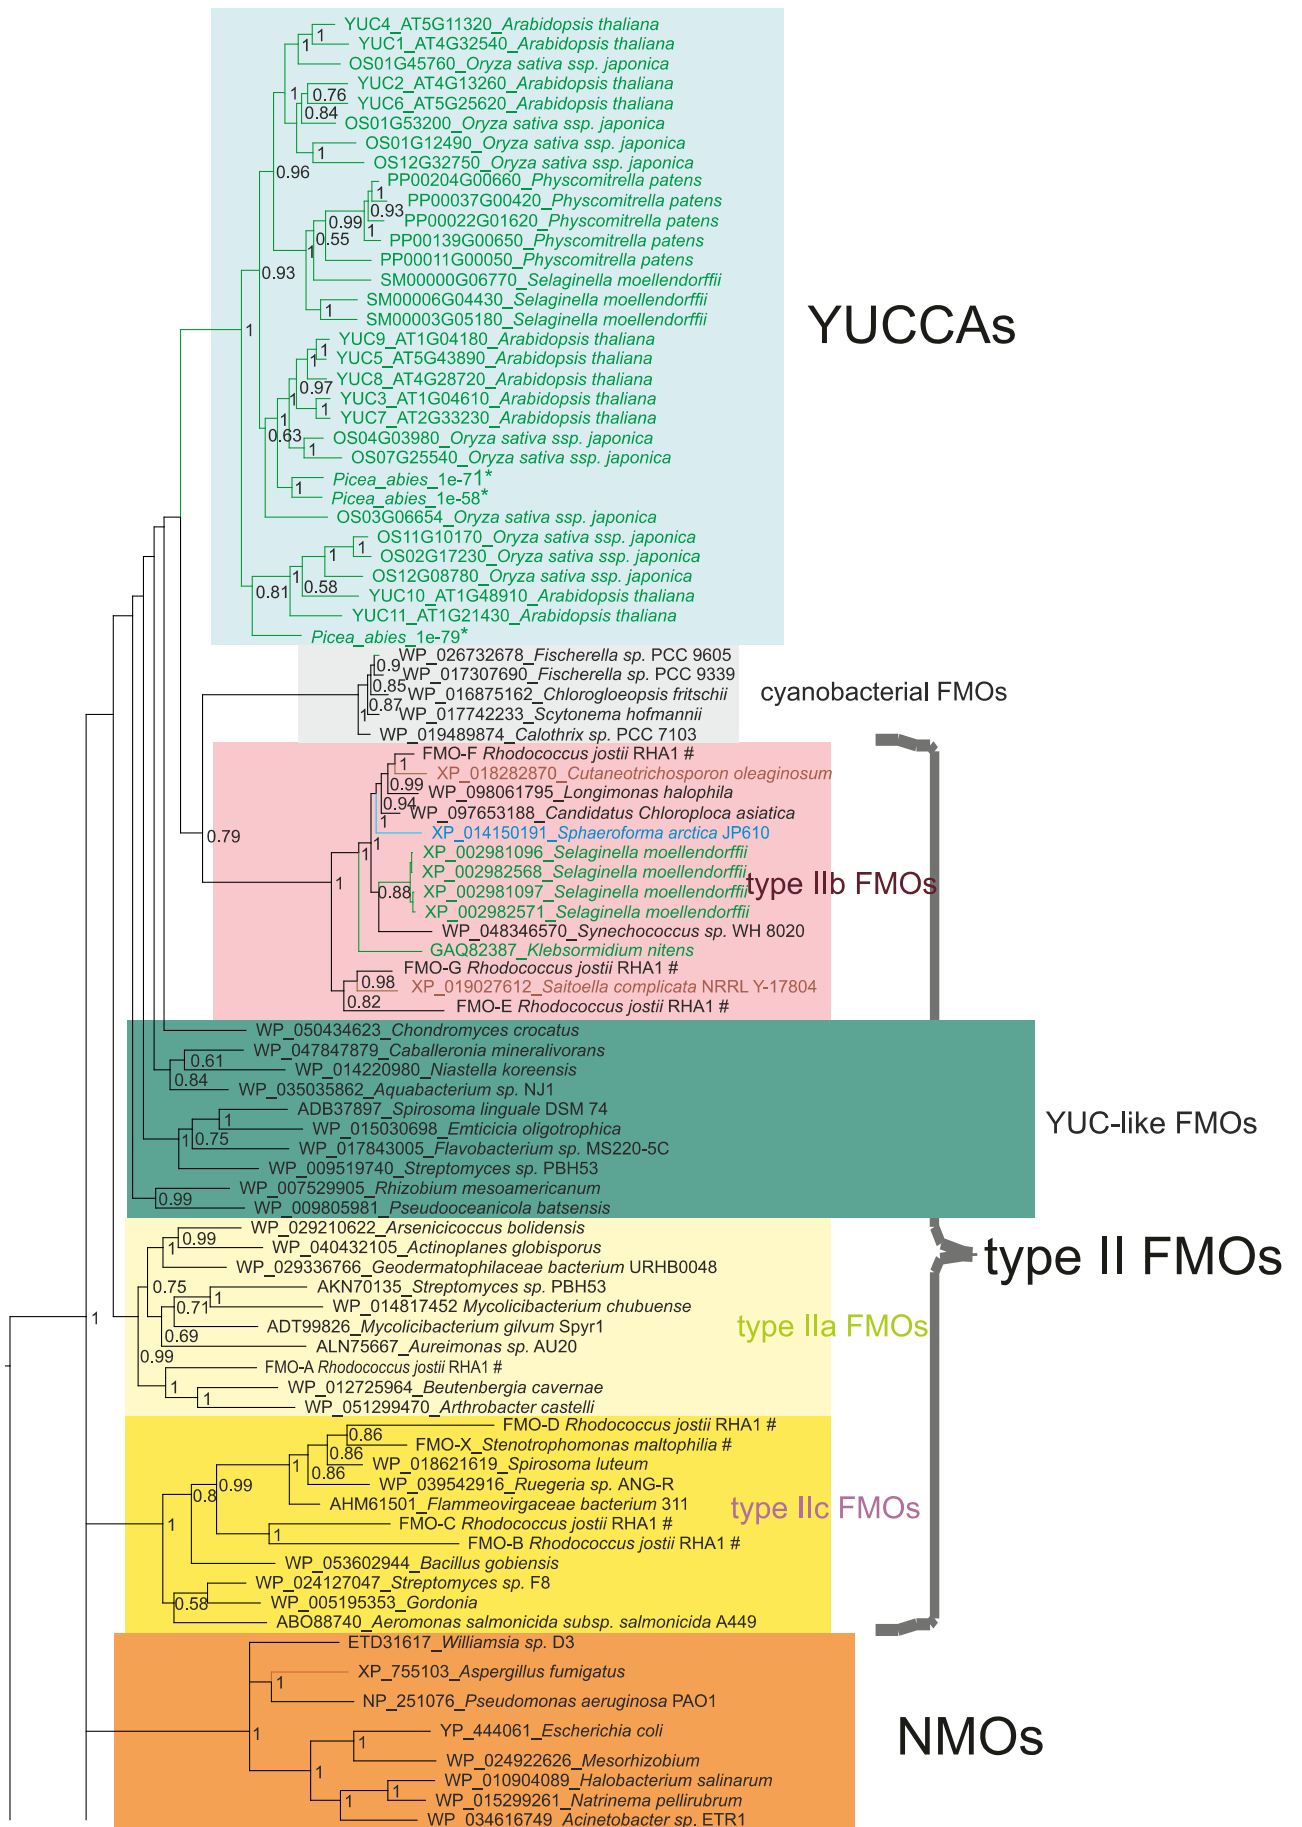

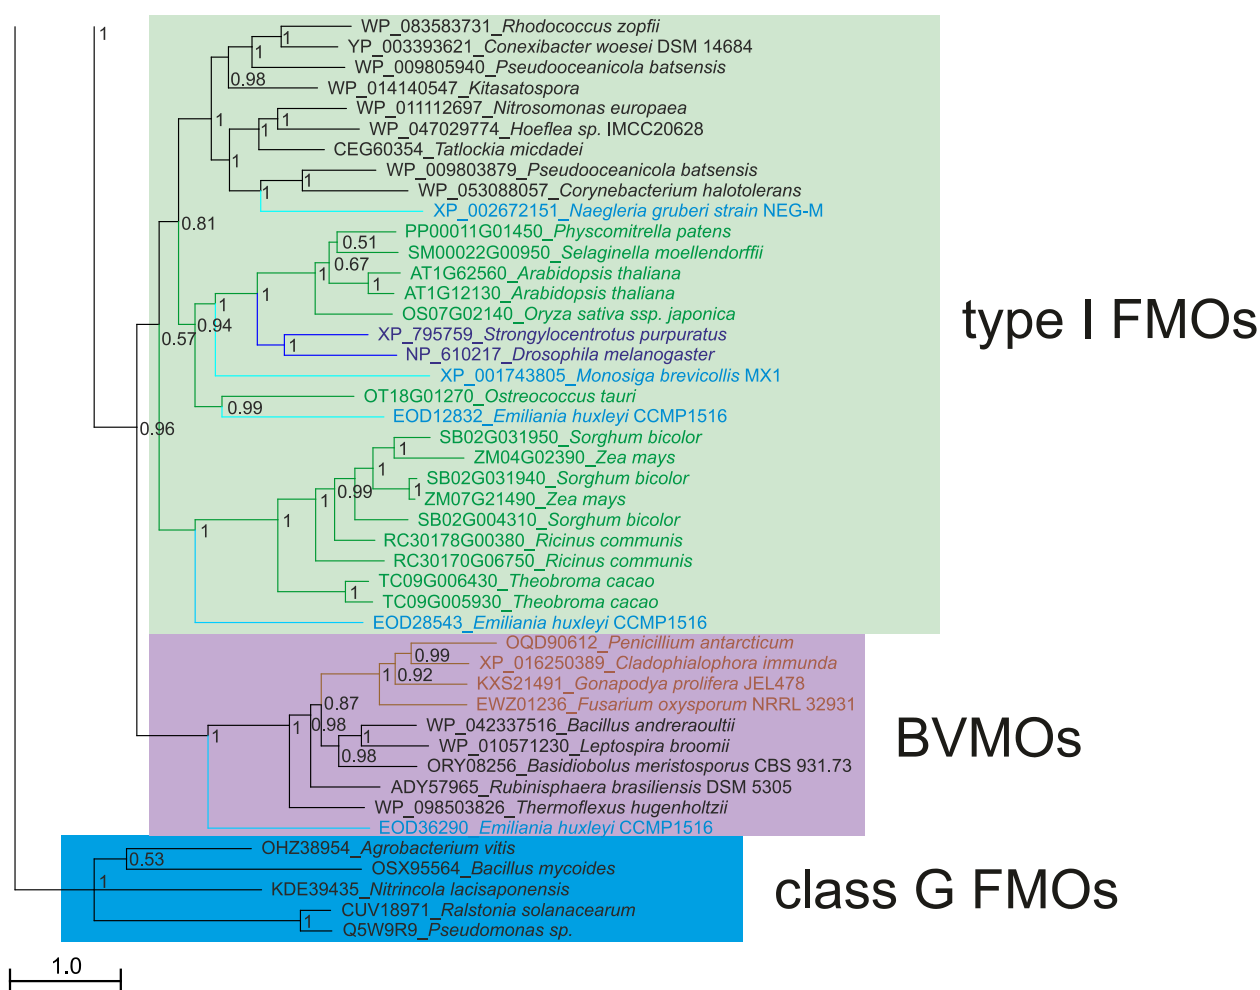

**Figure S1.** Phylogenetic tree of the class B flavoprotein monooxygenases, class\_B\_FMO\_proteins sample. The branches of green alga and land plant proteins are green; of fungi, brown; of protists, cyan; of animals, blue; of bacteria, black; and of archaeobacteria, gray. The class G flavoprotein monooxygenase proteins is outgroup (dark blue background). # denotes protein sequences from Riebel et al. [ref. 40 of the main text]: FMO-A – FMO-G from *R. jostii* RHA1; FMO-X *S. maltophilia* (B2FLR2). Asterisk (\*) denotes proteins identified in the Spruce Genome Project [refs. 67,68 of the main text; Congenie.org]. (a) Phylogeny reconstructed using RAxML. The numbers near the branches represent bootstrap support values. (b) Phylogeny reconstructed using mrBayes. The numbers near the branches represent posterior probability values.

(a)

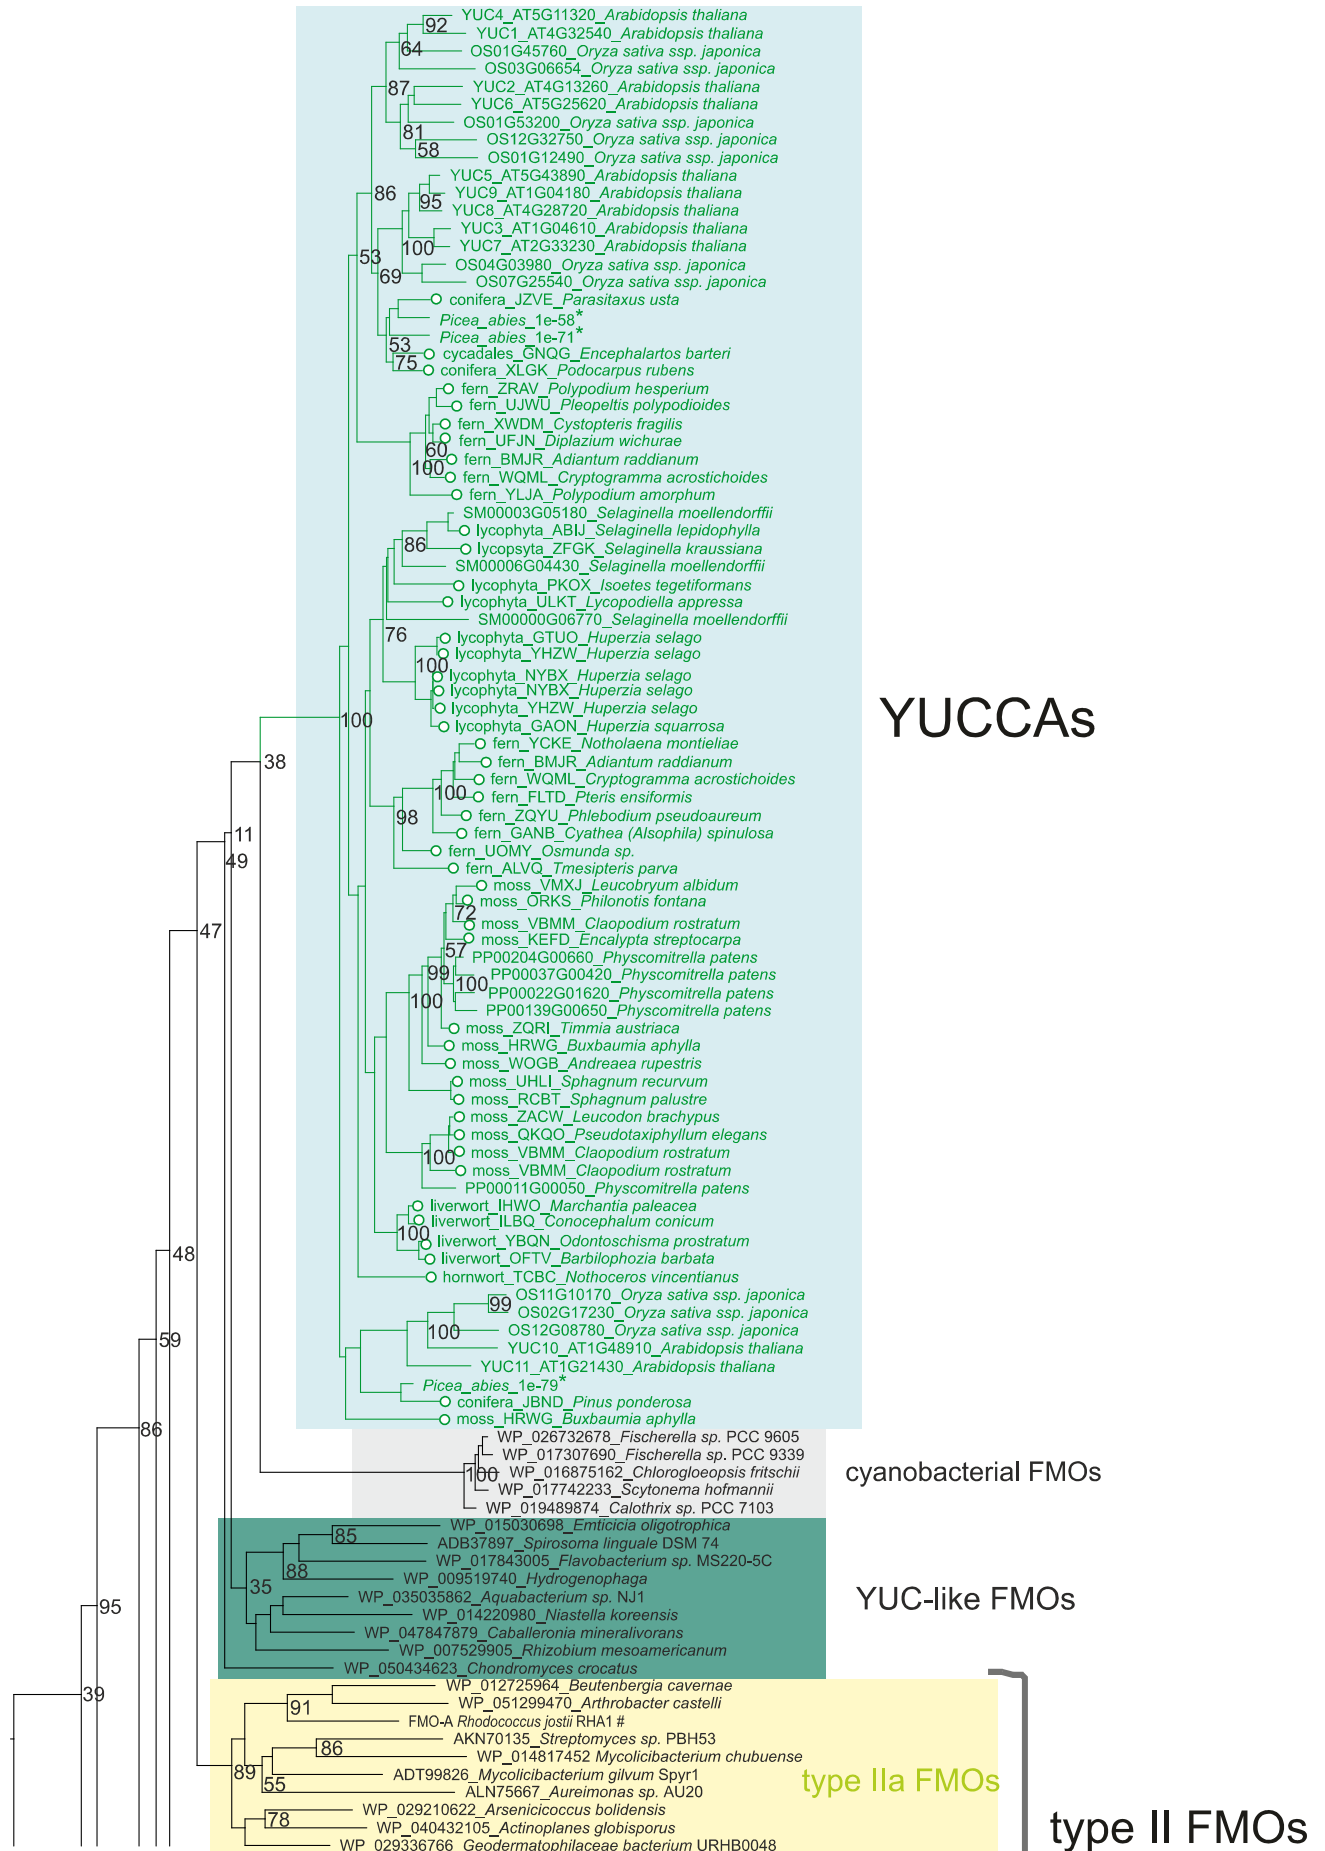

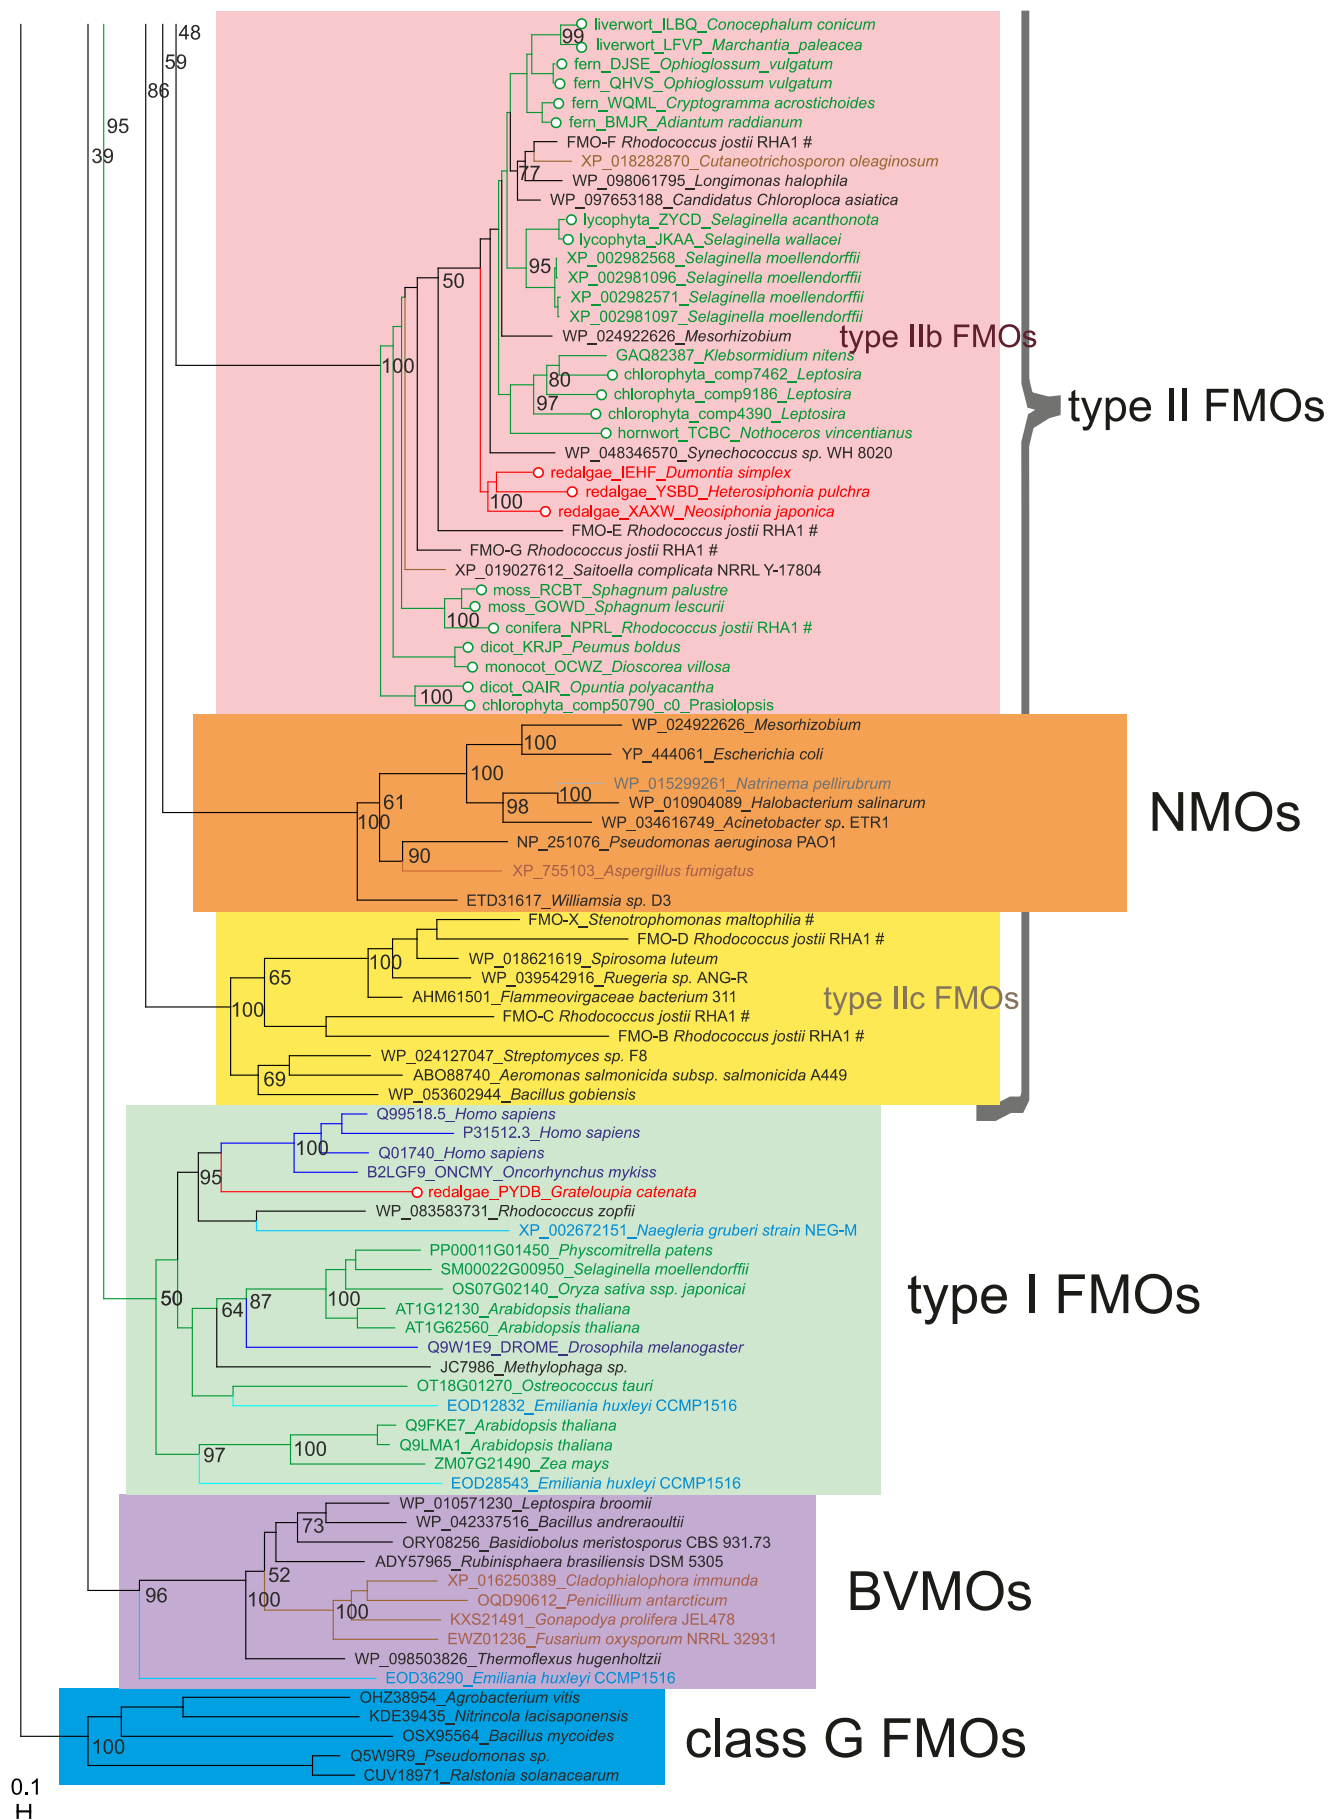



(b)

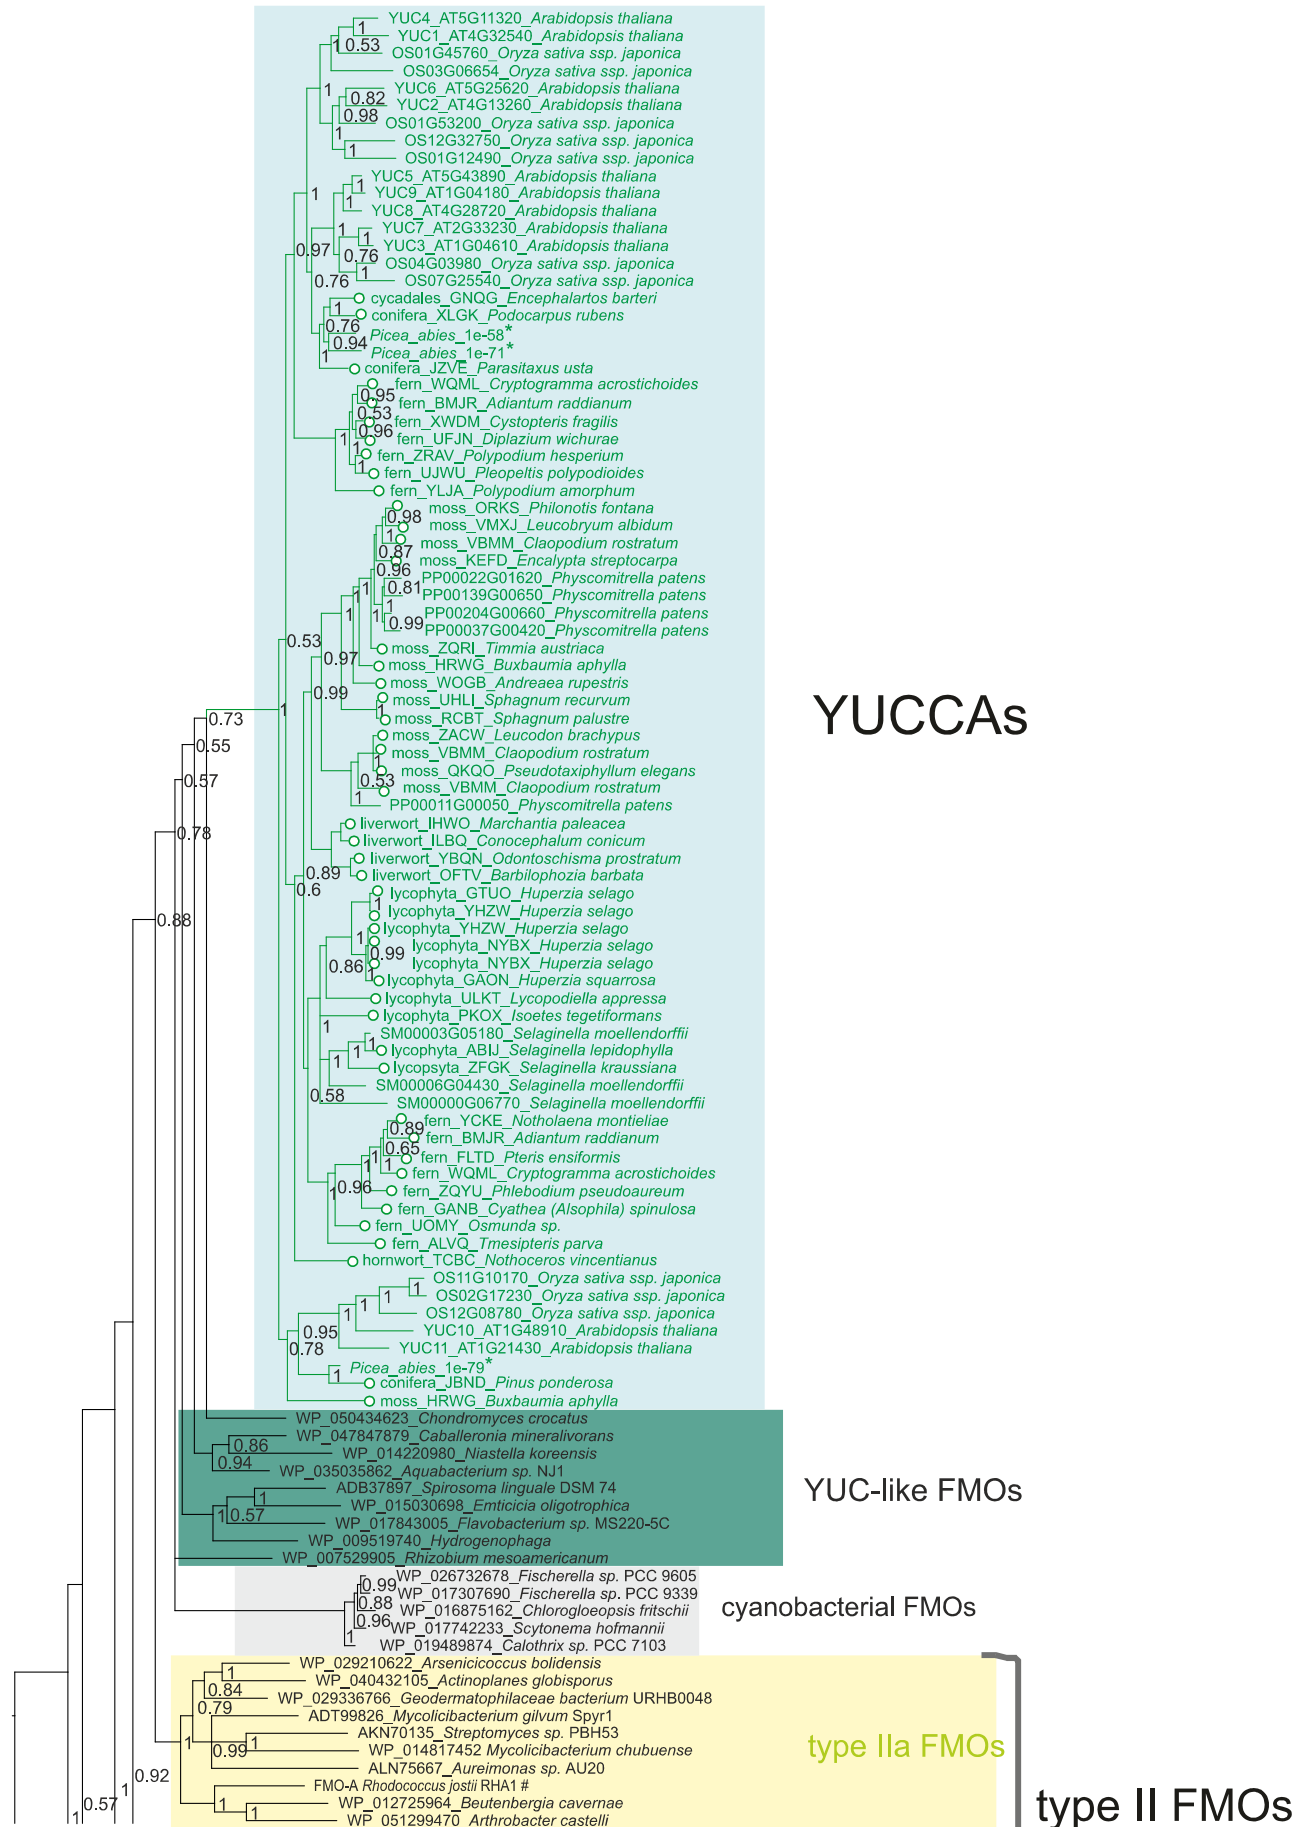

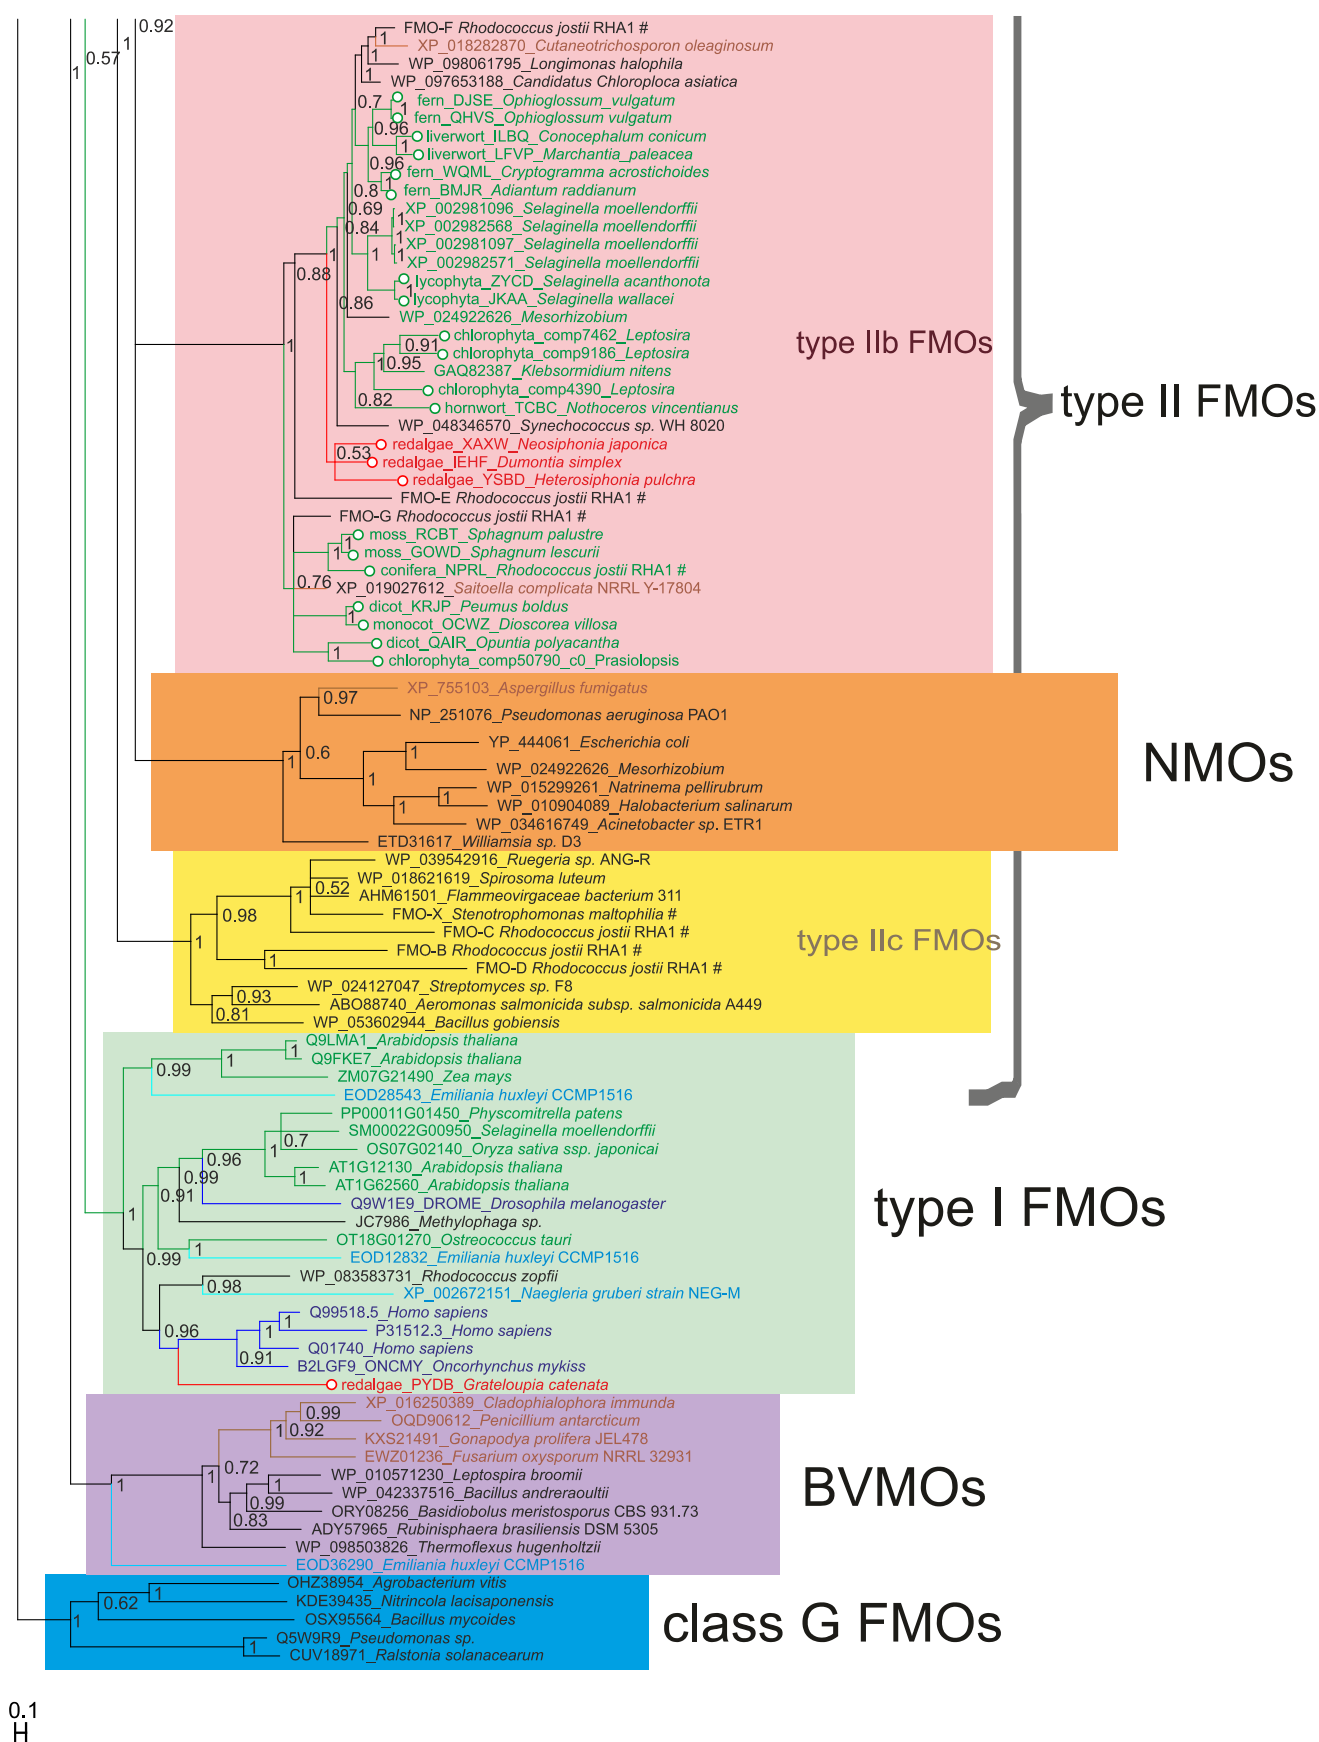

**Figure S2.** Phylogenetic trees of the class B flavoprotein monooxygenases, class\_B\_FMO\_proteins\_ext sample. All designations are as in Figure S1a; sequences from the 1KP project [ref. 49 of the main text] and the Green Algal Tree of Life Project [ref. 26 of the main text] are marked with a circle. The sequences of green algae and land plants are colored green; of red algae, red; of fungi, brown; of protists, cyan; of animals, blue; of bacteria, black, and of archaeobacteria, gray. The class G flavoprotein



monooxygenase proteins is outgroup (dark blue background). # denotes protein sequences from Riebel et al. [ref. 17 of the main text]: FMO-A – FMO-G from *R. jostii* RHA1; FMO-X *S. maltophilia* (B2FLR2). Asterisk (\*) denotes proteins identified in the Spruce Genome Project [refs. 67,68 of the main text; Congenie.org]. (a) Phylogeny reconstructed using RAxML. The numbers near the branches represent bootstrap support values. (b) Phylogeny reconstructed using mrBayes. The numbers near the branches represent posterior probability values.

(a)

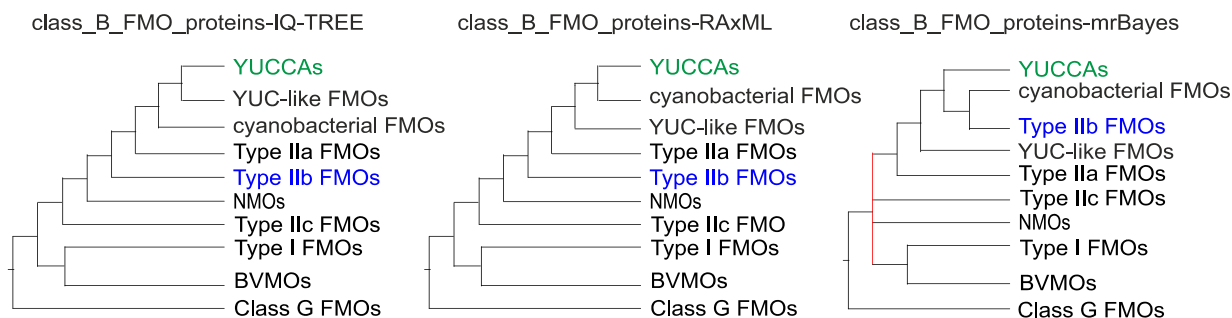

(b)

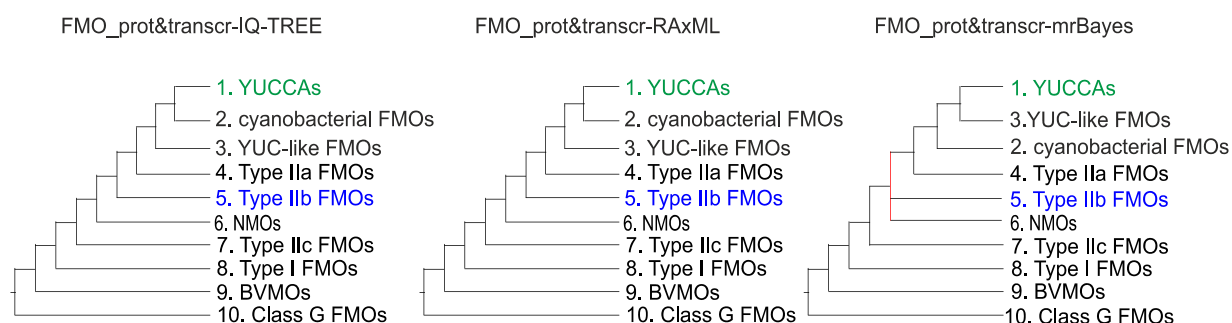

**Figure S3.** Simplified cladograms of the phylogenetic trees of the class B flavoprotein monooxygenases constructed by: IQ-TREE, RAxML and mrBayes. The YUCCA clade is denoted with green and type IIb FMO clade, with dark blue. Red line denotes a polyfurbations.

(a) Cladograms of the trees built using class B flavoprotein monooxygenase proteins

(class\_B\_FMO\_proteins\_ext sample).

(b) Cladograms of the trees built using extended class B flavoprotein monooxygenase proteins

(class\_B\_FMO\_proteins\_ext sample).
